# Supplementary material for: Synthesis of Multicolor Carbon Dots Based on Solvent Control and Its Application in the Detection of Crystal Violet
Source: PubMed Central journal article supplement (PMC6915586; doi:10.3390/nano9111556), 2019-11-01
Supplement: nanomaterials-09-01556-s001.pdf [file nanomaterials-09-01556-s001.pdf]

# Supplementary Materials: Synthesis of Multicolor Carbon Dots Based on Solvent Control and Its Application in the Detection of Crystal Violet

Dan Zhao\*, Xuemei Liu, Zhixia Zhang, Rui Zhang, Liangxiu Liao, Xincai Xiao and Han Cheng

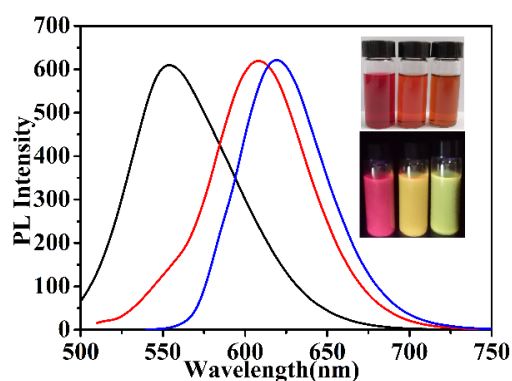

Figure S1. R-CDs Fluorescence spectra of four samples obtained by separation.

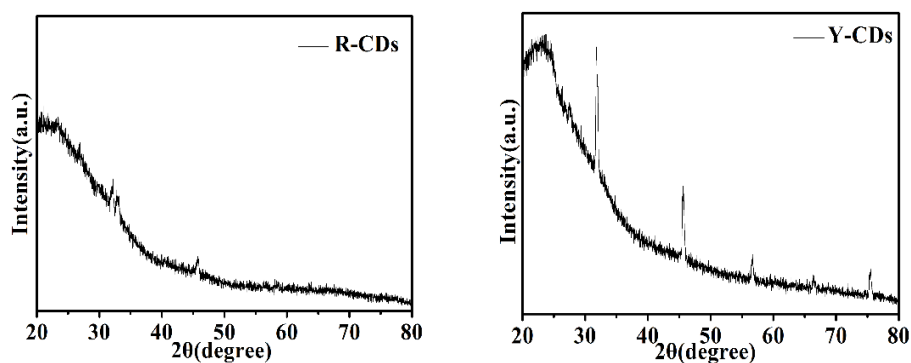

Figure S2. XRD patterns of the R-CDs and Y-CDs.

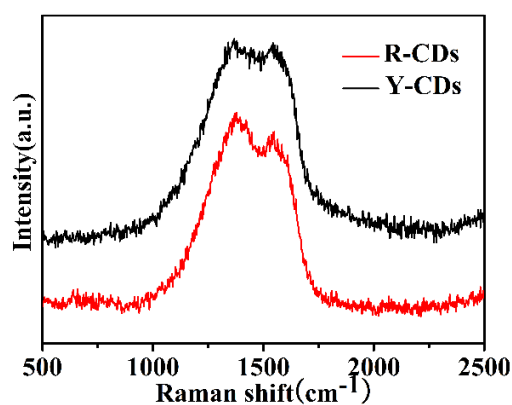

Figure S3. Raman spectra of the R-CDs and Y-CDs.

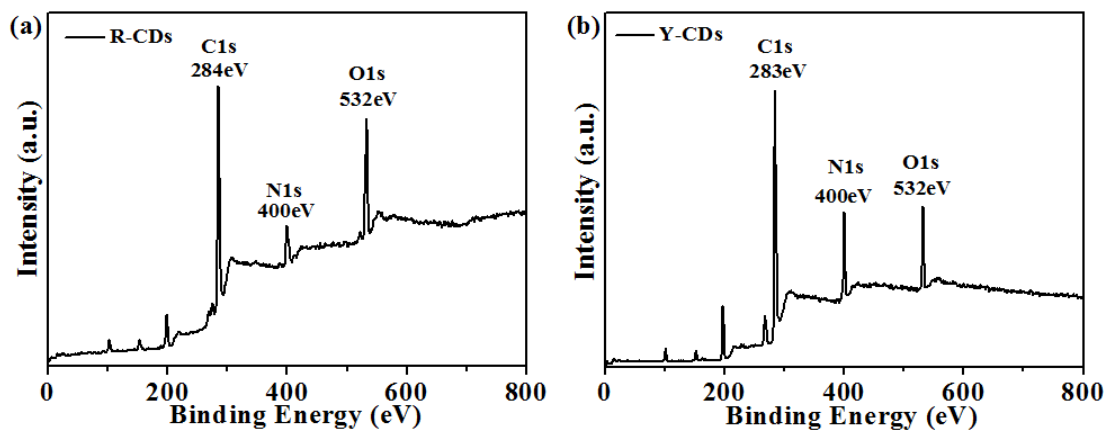

Figure S4. (a) R-CDs and (b) Y-CDs with XPS full spectrum.

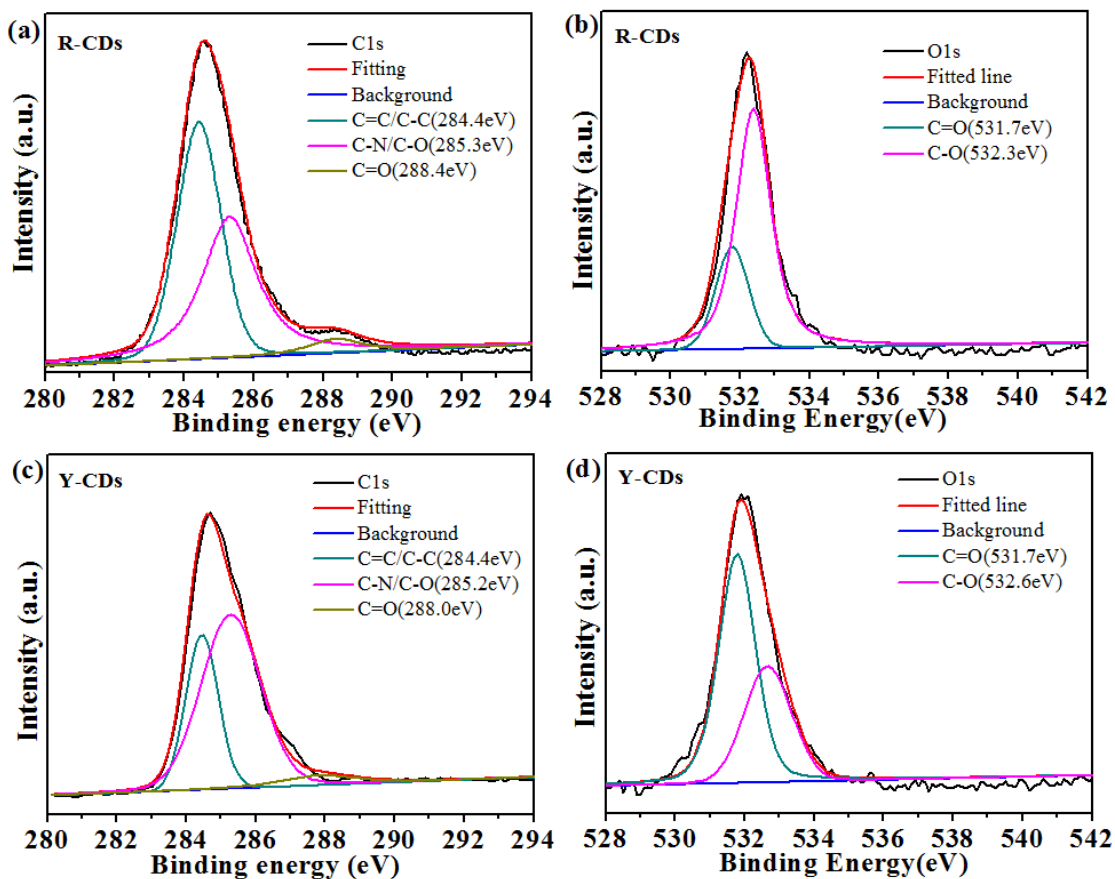

Figure S5. (a) C1s and (b) O1s spectra of R-CD, (c) C1s and (d) O1s spectra of Y-CDs.

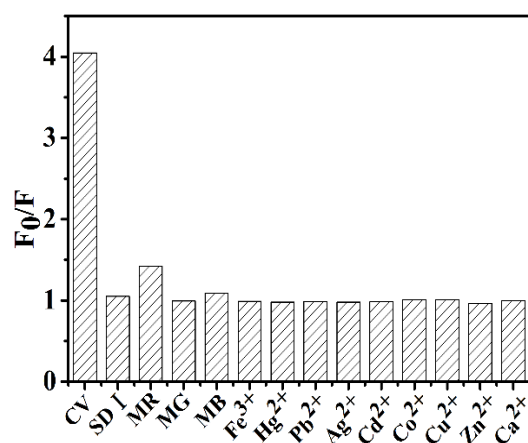

Figure S6. Sensitivity investigation of the Y-CDs for CV detection (samples concentration: 10  $\mu$ M).

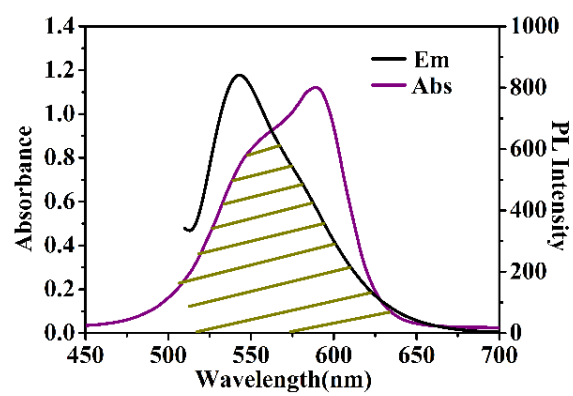

Figure S7. The overlap between absorption spectrum of CV and the emission spectra of Y-CDs.
